# Supplementary material for: The new and recurrent FLT3 juxtamembrane deletion mutation shows a dominant negative effect on the wild-type FLT3 receptor
Source: PubMed Central journal article supplement (PMC4921855; doi:10.1038/srep28032), 2016-06-27
Supplement: srep28032-s1.pdf [file srep28032-s1.pdf]

## **Supplementary information**

### **The new and recurrent FLT3 juxtamembrane deletion mutation shows a dominant negative effect on the wild-type FLT3 receptor**

*Nadine Sandhöfer, Julia Bauer, Katrin Reiter, Annika Dufour, Maja Rothenberg, Nikola P. Konstandin, Evelyn Zellmeier, Belay Tizazu, Philipp A. Greif, Klaus H. Metzeler, Wolfgang Hiddemann, Harald Polzer and Karsten Spiekermann*

### **Supplemental Tables:**

- Supplemental Table S1: Overview about available material and performed analyses.

### **Supplemental Figures:**

- Supplemental Figure S1: Schematic representation of the juxtamembrane deletion mutant FLT3 receptor in comparison to the WT receptor.
- Supplemental Figure S2: Cell surface expression of FLT3 constructs.
- Supplemental Figure S3: Binding capacity for biotinylated FLT3 ligand.
- Supplemental Figure S4: Full-length immuno blots of figure 1 and 2.
- Supplemental Figure S5: Dominant negative effect of FLT3 p.Q569Vfs\*2 and its heterodimerisation with FLT3 WT

**Figure S1**

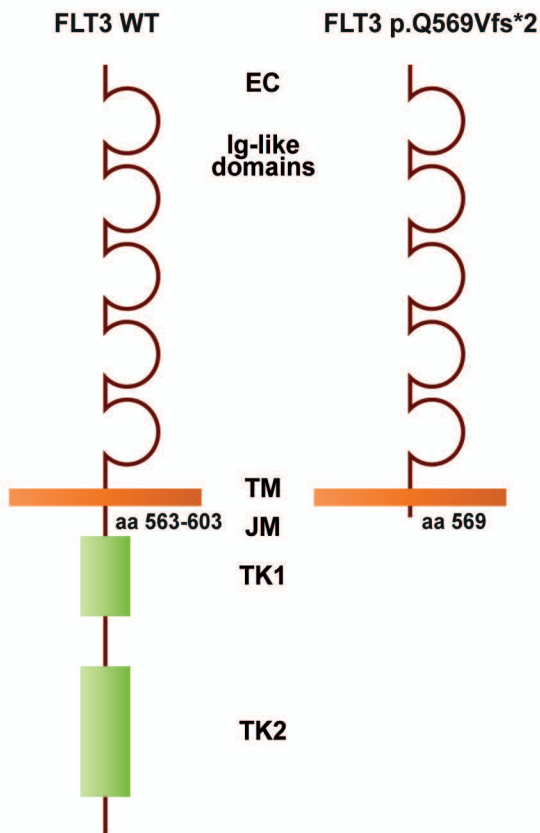

**Figure S1: Schematic representation of the juxtamembrane deletion mutant FLT3 receptor in comparison to the FLT3 WT receptor.** The mutated receptor lacks a large proportion of the juxtamembrane domain as well as other intracellular domains, especially the tyrosine kinase domains 1/2.

aa: amino acid, EC: extracellular domain, Ig-lke domain: Immunglobuline-like domain, TM: transmembrane domain, JM: juxtamembrane domain, TK1/2: tyrosine kinase domain 1/2.

**Figure S2**

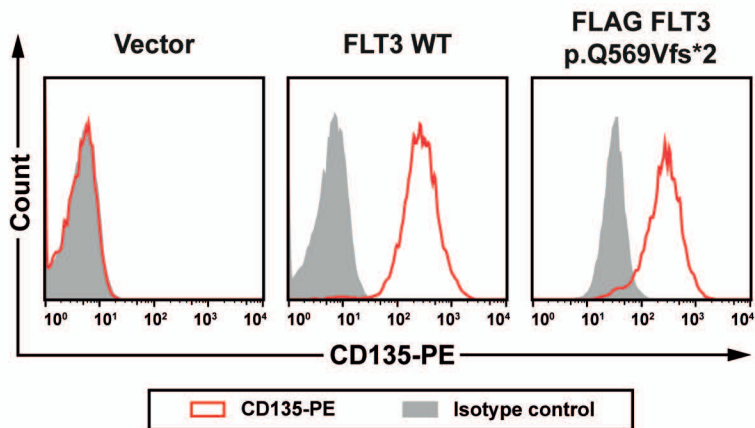

**Figure S2: Cell surface expression of the FLT3 constructs.** Ba/F3 cells stably expressing the indicated constructs were stained with CD135 antibody (red) or isotype control (grey) and analyzed by flow cytometry. One representative example is shown.

**Figure S3**

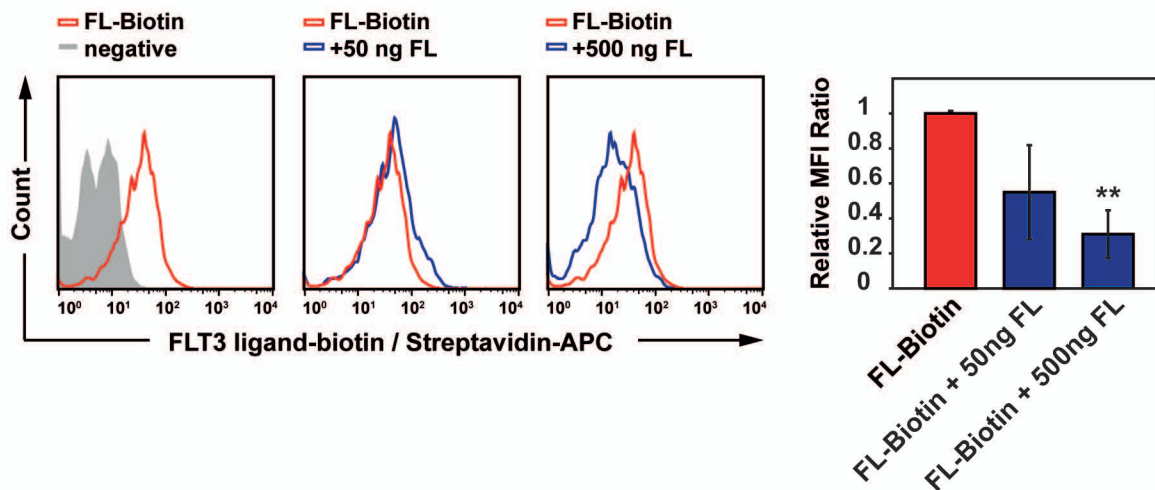

**Figure S3: Binding capacity for biotinylated FLT3 ligand.** Ba/F3 cells stably expressing FLT3 p.Q569Vfs\*2 were incubated with biotinylated human FLT3 ligand (FL). Receptor bound biotinylated FL was detected with streptavidin-APC using flow cytometry. As a negative control biotinylated soybean trypsin inhibitor was used. Different amounts of unbiotinylated FL (50 ng; 500 ng) were added to determine the staining specificity. One representative example is shown (left). Binding of biotinylated FL to FLT3 p.Q569Vfs\*2 without addition of unbiotinylated FL is set as 1. Shown are mean values of the relative mean fluorescence intensity ratios (MFI) ± SEM of at least three independent experiments (right); \*\* p<0.01.

**Figure S4**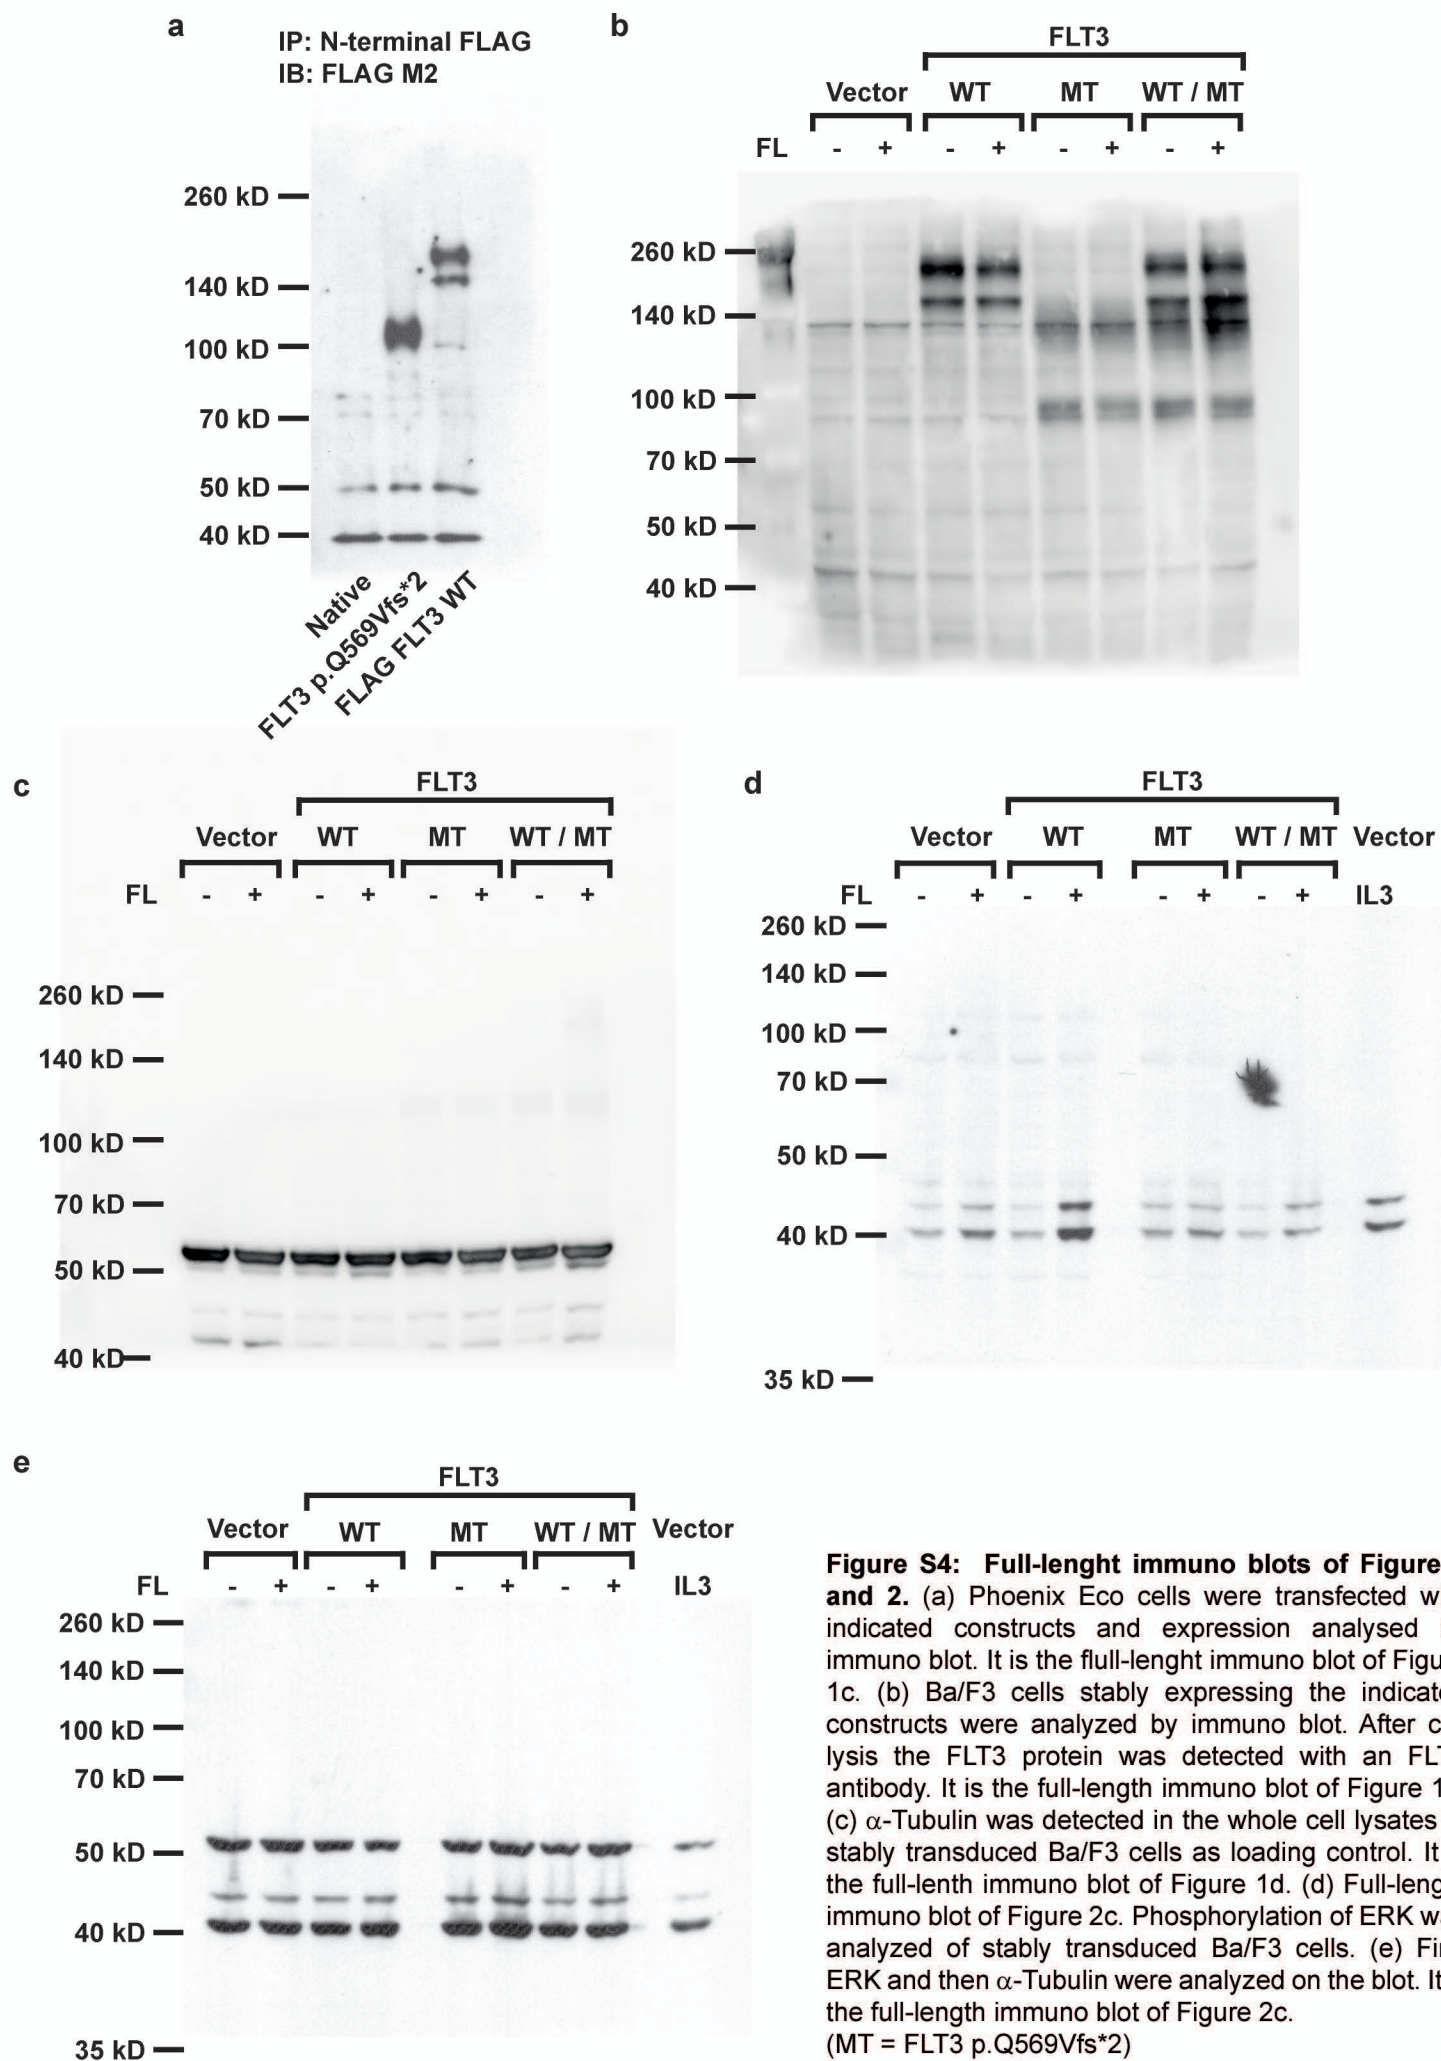

**Figure S4: Full-length immuno blots of Figure 1 and 2.** (a) Phoenix Eco cells were transfected with indicated constructs and expression analysed by immuno blot. It is the full-length immuno blot of Figure 1c. (b) Ba/F3 cells stably expressing the indicated constructs were analyzed by immuno blot. After cell lysis the FLT3 protein was detected with an FLT3 antibody. It is the full-length immuno blot of Figure 1d. (c)  $\alpha$ -Tubulin was detected in the whole cell lysates of stably transduced Ba/F3 cells as loading control. It is the full-length immuno blot of Figure 1d. (d) Full-length immuno blot of Figure 2c. Phosphorylation of ERK was analyzed of stably transduced Ba/F3 cells. (e) First ERK and then  $\alpha$ -Tubulin were analyzed on the blot. It is the full-length immuno blot of Figure 2c. (MT = FLT3 p.Q569Vfs\*2)



**Figure S5****a**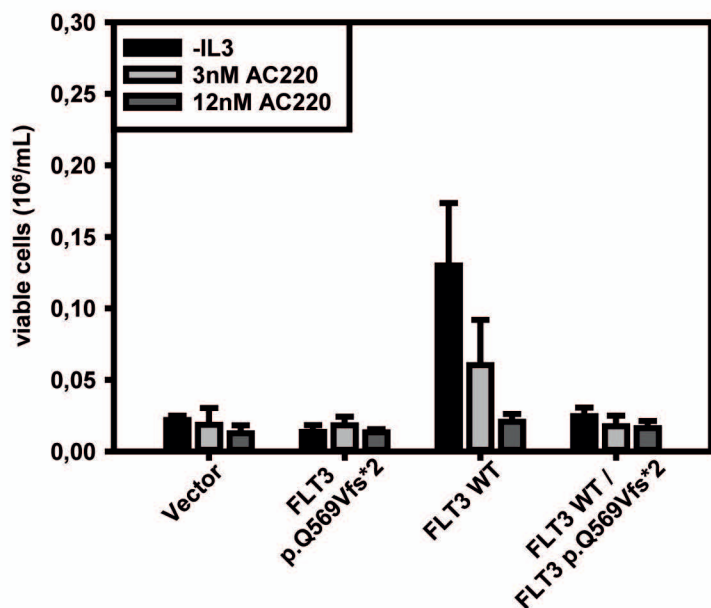**b**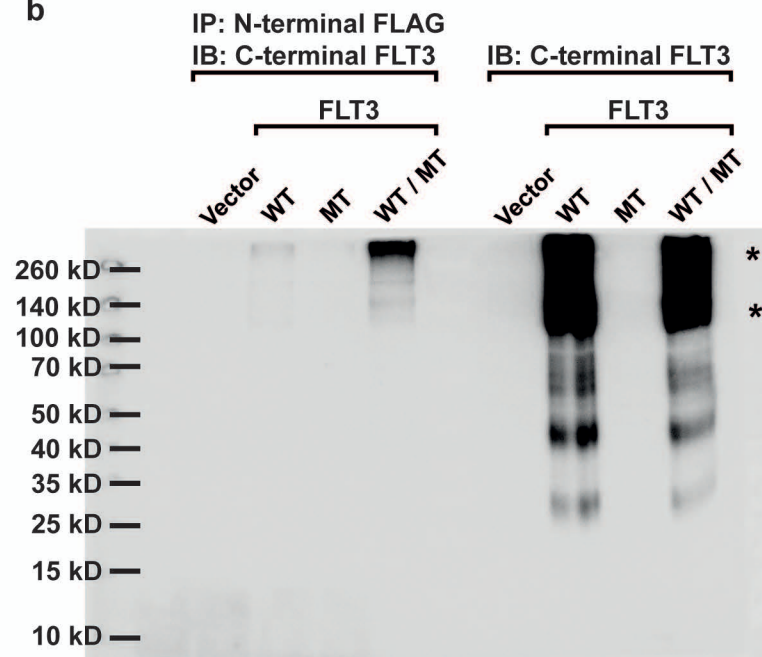**c**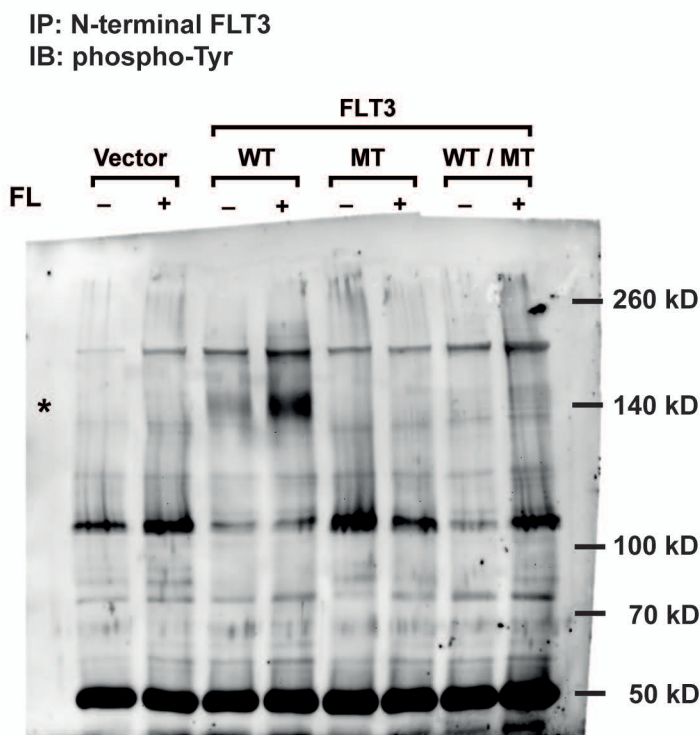**d**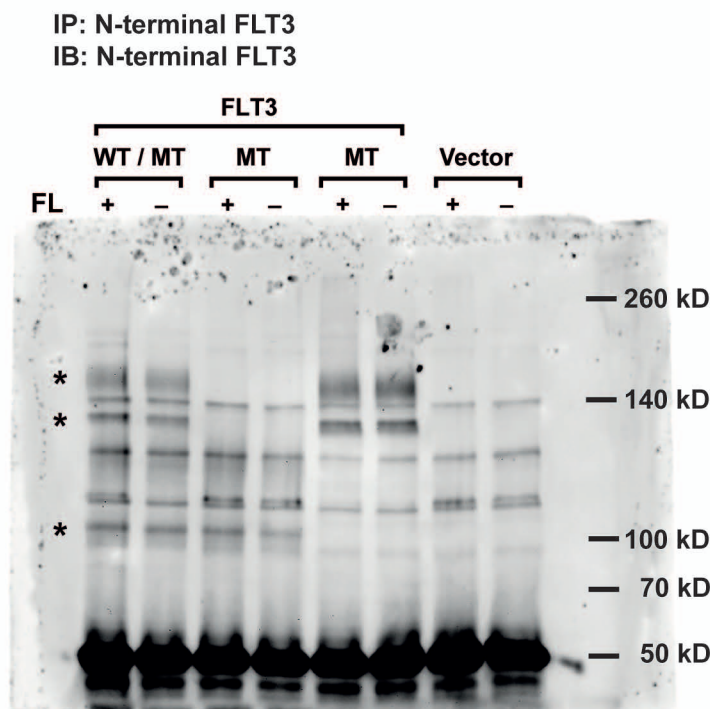

**Figure S5: Dominant negative effect of FLT3 p.Q569Vfs\*2 and its heterodimerisation with FLT3 WT.** (a) Ba/F3 cells stably expressing the indicated constructs were seeded at a density of  $4 \times 10^4/\text{mL}$  in the absence of cytokines and indicated concentrations of AC220. Viable cells were counted by trypan blue exclusion after 72 hours. Shown are mean values  $\pm$  SEM of three independent experiments. (b) HEK 293T were transfected with indicated constructs. After lysis FLT3 p.Q569Vfs\*2 was immunoprecipitated via its FLAG-tag from whole cell lysates. SDS-gel was run without reducing agents and in MOPS buffer. After blotting the FLT3 WT was detected with a C-terminal FLT3 antibody (\* indicating FLT3 dimer and monomer; MT = FLT3 p.Q569Vfs\*2). (c,d) From whole cell lysates of stable Ba/F3 cells the FLT3 protein was immunoprecipitated with an N-terminal FLT3 antibody (SF1.340) (\* indicating FLT3 specific bands; MT = FLT3 p.Q569Vfs\*2). After blotting the phosphorylation status of FLT3 was detected by a pTyr antibody (c) and total FLT3 protein with a different N-terminal FLT3 antibody (4B12) (d).
